# Supplementary material for: Discovery of Farnesoid X Receptor Antagonists Based on a Library of Oleanolic Acid 3-O-Esters through Diverse Substituent Design and Molecular Docking Methods
Source: MDPI journal article supplement (doi:10.3390/molecules22050690), 2017-04-26
Supplement: s1 [file s1]

# Discovery of Farnesoid X Receptor Antagonists Based on a Library of 3-*O*-Esters of Oleanolic Acid through Diverse Substitution Design and Molecular Docking Methods

Shao-Rong Wang <sup>1,2,\*\*</sup>, Tingting Xu <sup>3,4,\*\*</sup> Kai Deng <sup>1</sup>, Chi-Wai Wong <sup>5</sup>, Jinsong Liu <sup>4</sup>, and Wei-Shuo Fang <sup>1,\*</sup>

<sup>1</sup> State Key Laboratory of Bioactive Substances and Functions of Natural Medicines, Institute of Materia Medica, Chinese Academy of Medical Sciences & Peking Union Medical College, 2A Nanwei Road, Beijing 100050, China; wangshaorong@outlook.com

<sup>2</sup> Center for Drug Evaluation, China Food and Drug Administration, 1A Fuxing Road, Beijing 100038, P. R. China

<sup>3</sup> School of Life Sciences, University of Science and Technology of China, Hefei 230026, China; xu\_tingting@gibh.ac.cn

<sup>4</sup> State Key Laboratory of Respiratory Disease, Guangzhou Institutes of Biomedicine and Health, Chinese Academy of Sciences, Guangzhou 510530, China; liu\_jinsong@gibh.ac.cn

<sup>5</sup> NeuMed Pharmaceuticals Limited, Unit 509, 5/F BioTech Center I, No. 9 Science Park West Avenue, Shatin, Hong Kong; wongcw123456@yahoo.com

\* Correspondence: wfang@imm.ac.cn; Tel.: +86-10-63165229

\*\* These authors contributed equally to this paper.

## Table of Contents

|                                                                                                  |   |
|--------------------------------------------------------------------------------------------------|---|
| Experimental details for the synthesis of the known compounds 2a, 2d, 4, 6-9.....                | 2 |
| Copies of <sup>1</sup> HNMR and <sup>13</sup> CNMR spectrum of novel compounds 3a-d, 13, 16..... | 4 |
| Figure S1 .....                                                                                  | 9 |

#### Synthesis of compound 4

To a stirred solution of **1a** (200 mg, 0.44 mmol) in a mixed solvent of dioxane (2 ml) and water (2 ml) was added K<sub>2</sub>CO<sub>3</sub> (121 mg, 0.88 mmol) and tetrabutylammonium bromide (112 mg, 0.35 mmol). After benzyl chloride (100  $\mu$ l, 0.88 mmol) was added dropwise, the mixture was heated to 80°C and maintained for 3 h. The excess K<sub>2</sub>CO<sub>3</sub> was filtered off. The filtrate was concentrated under reduced pressure. And the residue was purified through a silica chromatography column (petroleum ether : acetone 10 : 1) to afford the product (**4**) as white solid (198 mg, 83.5 %).

#### Synthesis of compound 6

To a stirred solution of **5** (106 mg, 1.0 mmol) in a mixed solvent of MeOH (0.6 ml) and water (0.3 ml) was added Na<sub>2</sub>CO<sub>3</sub> (58 mg, 0.55 mmol) and hydroxylammonium chloride (70 mg, 1.0 mmol). The mixture was stirred at room temperature for 3 h. Then water (2 ml) was added, and the pH of the solution was adjusted to 2. Diethyl ether (5 ml  $\times$  3) was used to extract the product from aqueous layer. Then the organic layer was collected, dried over Na<sub>2</sub>SO<sub>4</sub> and concentrated. And the residue was purified through a silica chromatography column (petroleum ether : EtOAc 15 : 1) to afford the product (**6**) as white solid (74 mg, 61.2 %). <sup>1</sup>H NMR (300 MHz, CDCl<sub>3</sub>):  $\delta$  8.16 (1H, s, C<sub>6</sub>H<sub>5</sub>NHOH), 7.57 (2H, m, H-2, 6 of Ph), 7.39 (3H, m, H-3, 4, 5 of Ph).

#### Synthesis of compound 7

To a stirred solution of **6** (20 mg, 0.17 mmol) in dry DMF (0.2 ml) was added N-chlorosuccinimide (NCS) (5 mg, 0.037 mmol). The mixture was heated to 40°C, and two drops of 2M HCl (aq.) was added. After 10 min, the color of the solution turned to light blue. Then the reaction was moved to room temperature. After another portion of NCS (12 mg, 0.084 mmol) was added, the mixture was stirred at room temperature for 2 h. Then water (2 ml) was added, and the aqueous layer was extracted by diethyl ether (5 ml  $\times$  3). The organic layer was collected, dried over Na<sub>2</sub>SO<sub>4</sub> and concentrated. And the residue was purified through a silica chromatography column (petroleum ether : EtOAc 15 : 1) to afford the product (**7**) as white solid (14.3 mg, 55.8 %). <sup>1</sup>H NMR (300 MHz, CDCl<sub>3</sub>):  $\delta$  7.85 (2H, m, H-2, 6 of Ph), 7.44(3H, m, H-3, 4, 5 of Ph). ESI-MS:  $m/z$  [M+Na]<sup>+</sup> 179.0.

#### Synthesis of compound 8

To a stirred solution of **7** (10 mg, 0.06 mmol) in dichloromethane (DCM) (0.2 ml) was added propargyl alcohol (5  $\mu$ l, 0.09 mmol) and Et<sub>3</sub>N (13  $\mu$ l, 0.09 mmol) at room temperature. Then, the mixture was heated to 50 °C for 2 h. After the removal of the solvent, the residue was purified through a silica chromatography column (petroleum ether : EtOAc 3 : 1) to afford the product (**8**) as white solid (10 mg, 89.0 %). <sup>1</sup>H NMR (300 MHz, CDCl<sub>3</sub>):  $\delta$  7.78 (2H, m, H-2, 6 of Ph), 7.44 (3H, m, H-3, 4, 5 of Ph), 6.56 (1H, s, H of isoxazole), 4.81 (2H, s, H of methylene). ESI-MS:  $m/z$  [M+H]<sup>+</sup> 176.2.

#### Synthesis of compound 2a

To a stirred solution of **8** (12 mg, 0.07 mmol) in acetone (0.4 ml) was added Jones' reagent (50  $\mu$ l) at room temperature. Then, the mixture was stirred for 3 h. Then water (2 ml) was added, and the aqueous layer was extracted by diethyl ether (5 ml  $\times$  3). The organic layer was collected, washed with water (5 ml  $\times$  3), dried over Na<sub>2</sub>SO<sub>4</sub> and concentrated. The residue was recrystallized in CHCl<sub>3</sub> to afford the product (**2a**) as white solid (12 mg, 93.0 %). <sup>1</sup>H NMR (300 MHz, CDCl<sub>3</sub>):  $\delta$  7.97 (2H,

m, H-2, 6 of Ph), 7.61 (1H, s, H of isoxazole), 7.54 (3H, m, H-3, 4, 5 of Ph). ESI-MS:  $m/z$   $[M+H]^+$  190.3.

### Synthesis of compound 9

**2a** (13.8 mg, 0.072 mmol) was stirred with  $\text{SOCl}_2$  (1 ml) at 80°C for 6 h. Then the excess  $\text{SOCl}_2$  was evaporated under reduced pressure. And the residue was used directly for reactions below without any further purification.

### Synthesis of compound 2d

After the mixture of **14** (164  $\mu\text{l}$ , 2 mmol), hydroquinone (5 mg, 0.05 mmol) and **15** (0.2 ml, 2.3 mmol) was stirred at 100°C for 10 h, another portion of **15** (0.34 ml, 4 mmol) was added, and the reaction mixture was heated to 140 °C. After another 20 h, the reaction was stopped and concentrated. The residue was recrystallized in toluene to afford product (51 mg, 81.0 % based on 129 mg recovery of substrate).  $^1\text{H}$  NMR (300 MHz,  $\text{CDCl}_3$ ):  $\delta$  7.27 (1H, d, H-4 of pyrazole,  $J = 1.8$  Hz), 5.95 (1H, d, H-5 of pyrazole,  $J = 1.2$  Hz), 4.32 (1H, dd,  $-\text{N}-\text{CH}_2-\text{CH}-$ ,  $J = 6.3, 14.1$  Hz), 4.10 (1H, dd,  $-\text{N}-\text{CH}_2-\text{CH}-$ ,  $J = 5.4, 13.5$  Hz), 3.04 (1H, m,  $-\text{CH}_2-\text{CH}-\text{COOH}$ ), 2.22 (3H, s,  $\text{CH}_3$  of pyrazole), 1.14 (3H, d,  $J = 7.5$  Hz,  $\text{CH}_3-\text{CH}-\text{COOH}$ ). ESI-MS:  $m/z$   $[M+H]^+$  169.1.

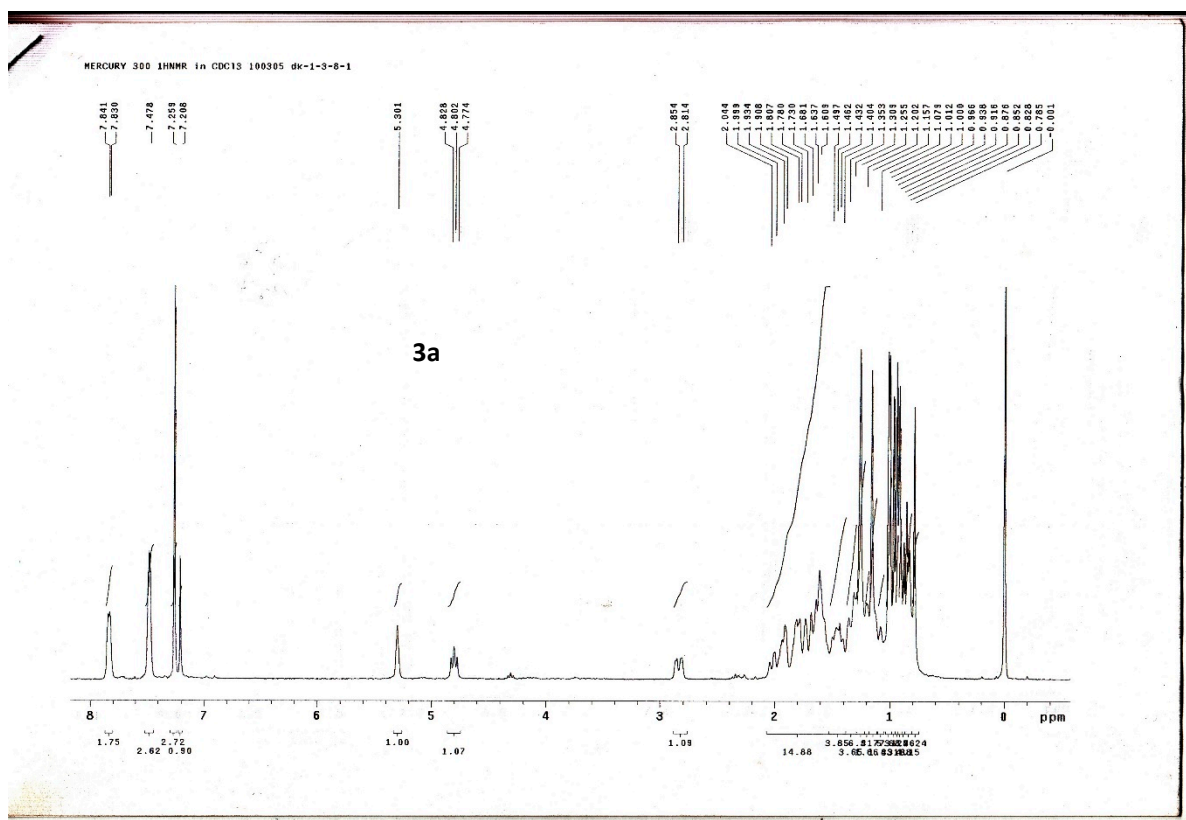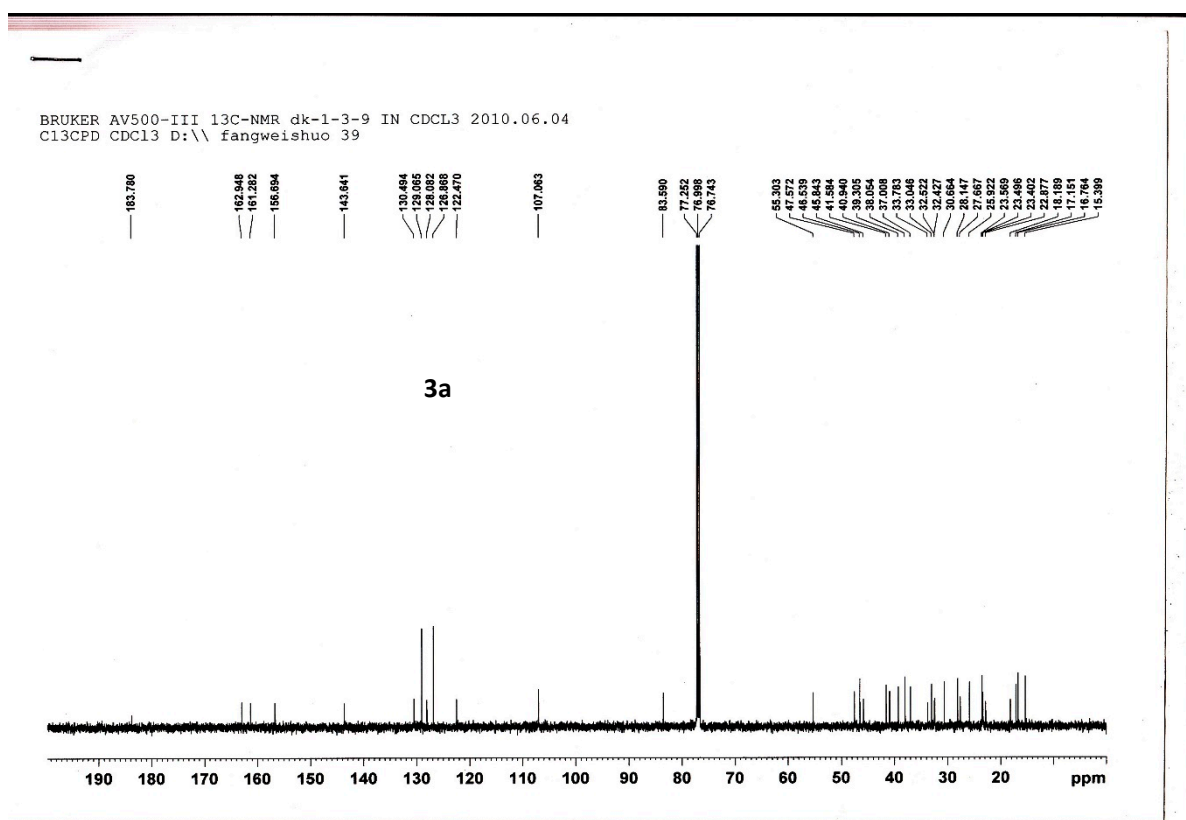

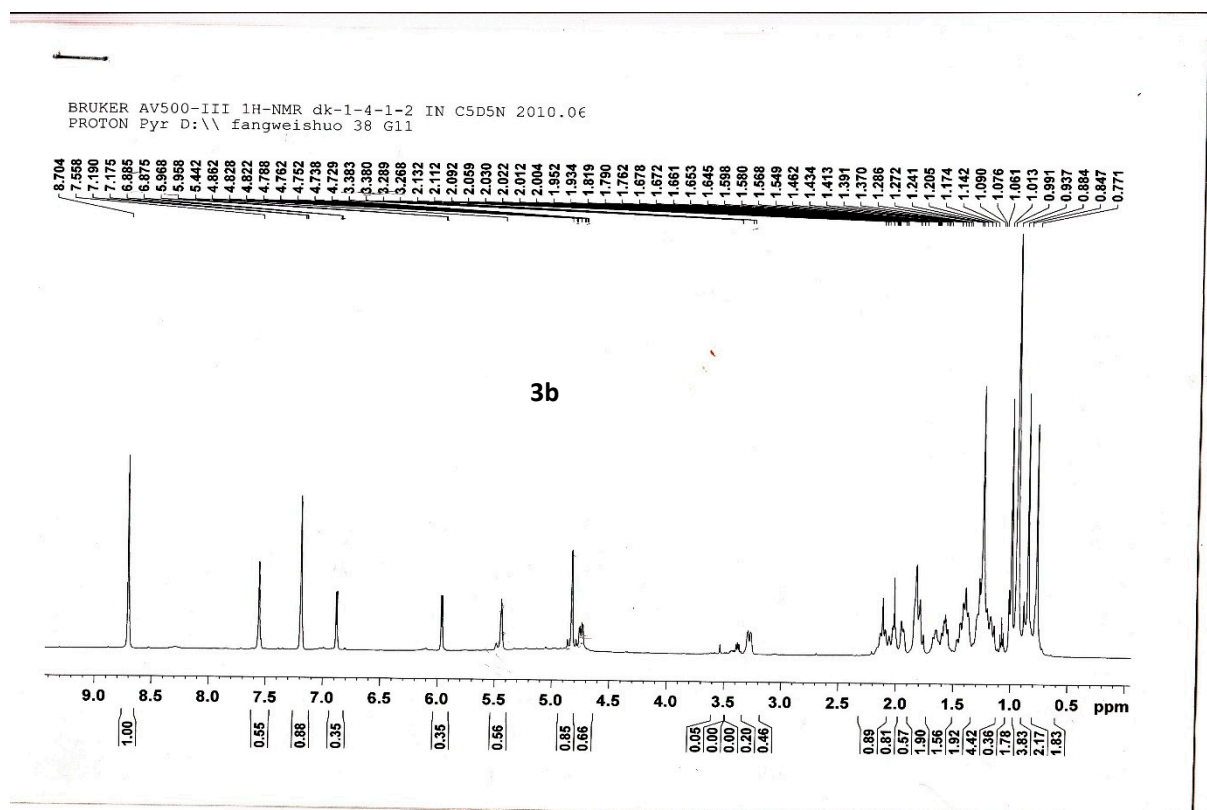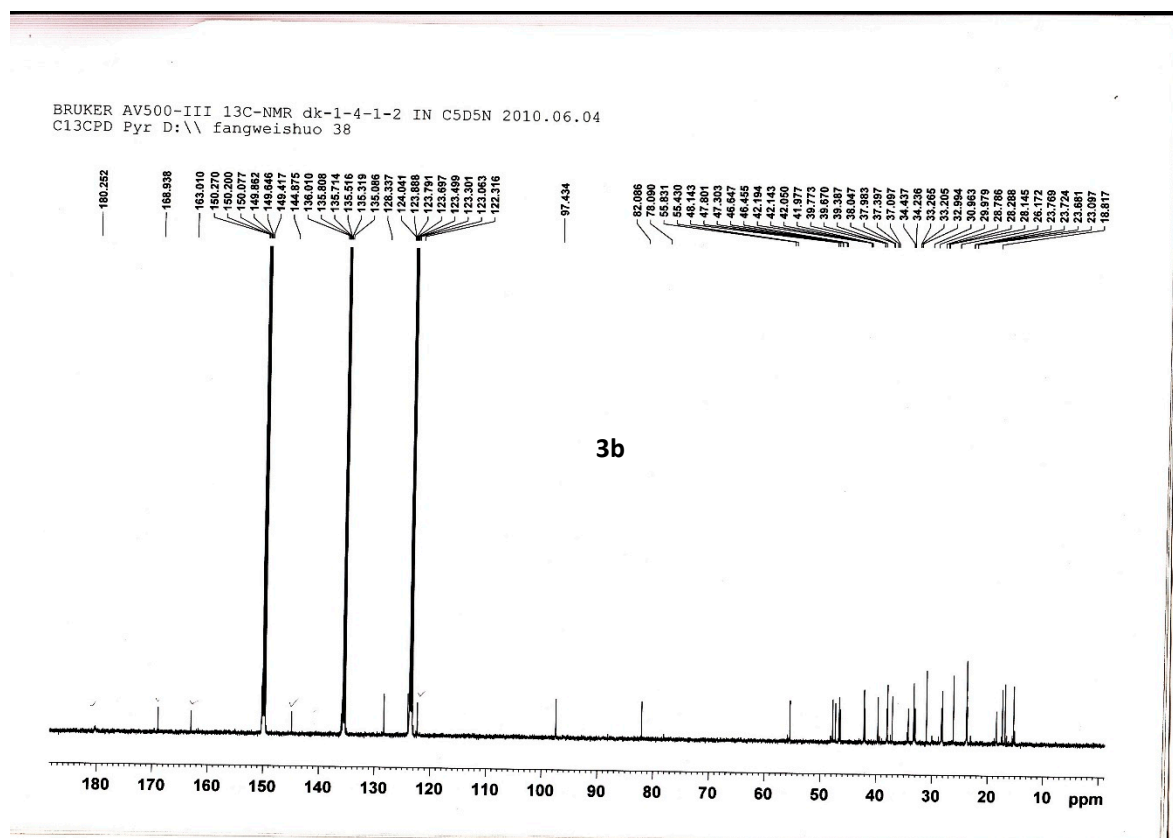



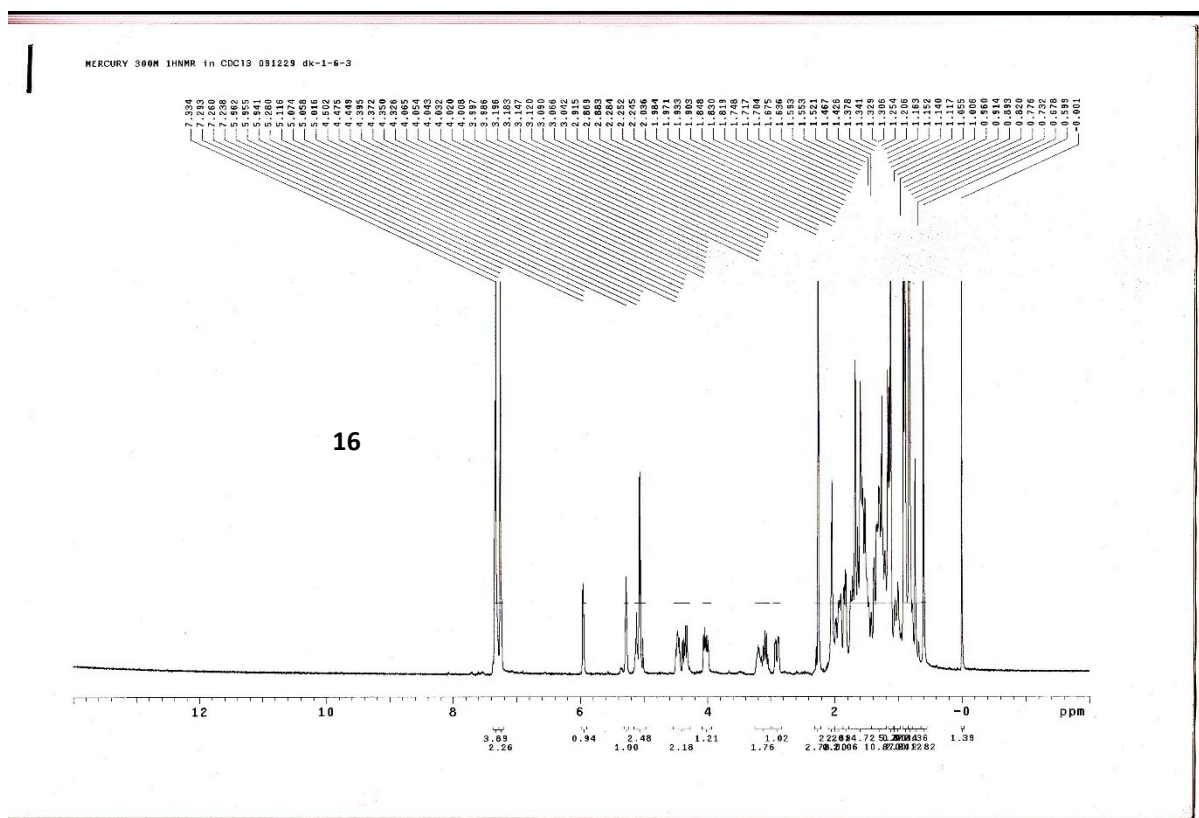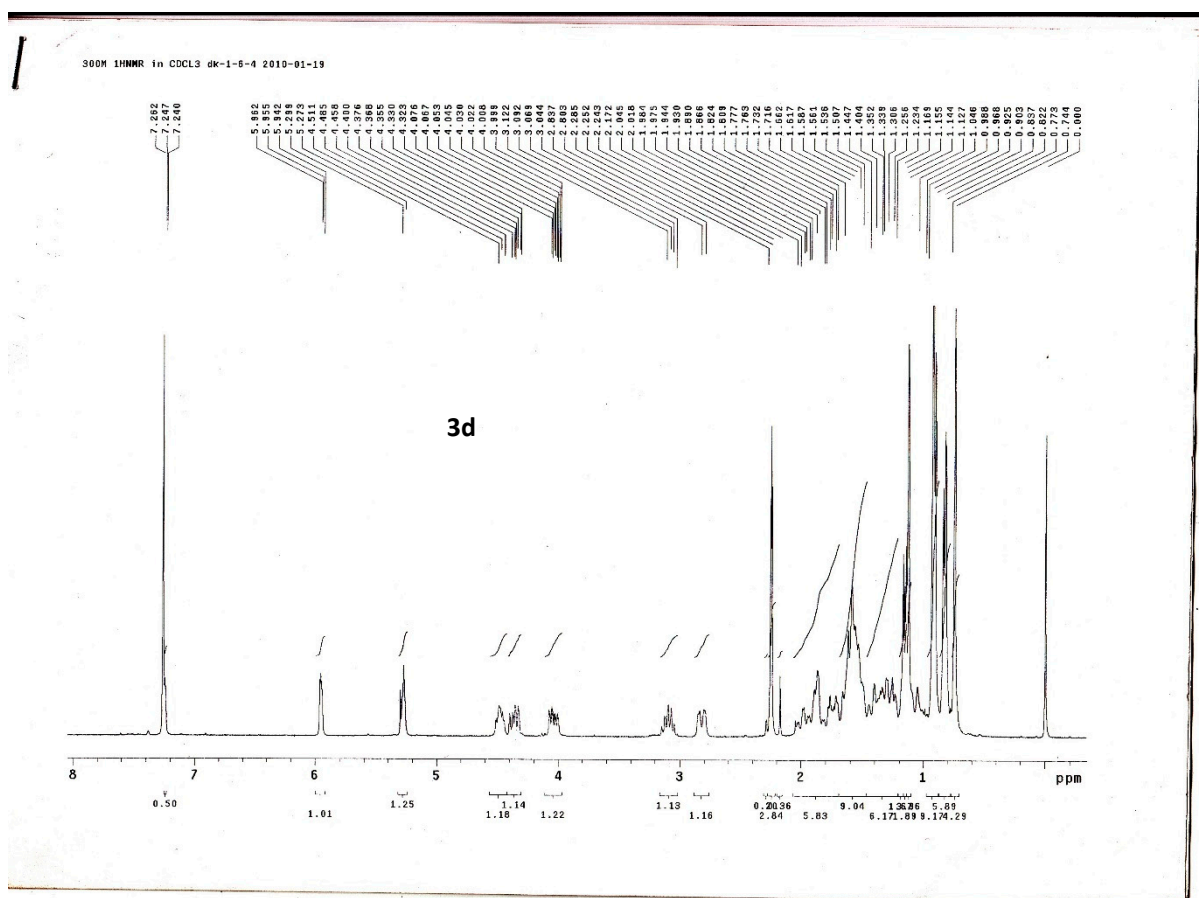



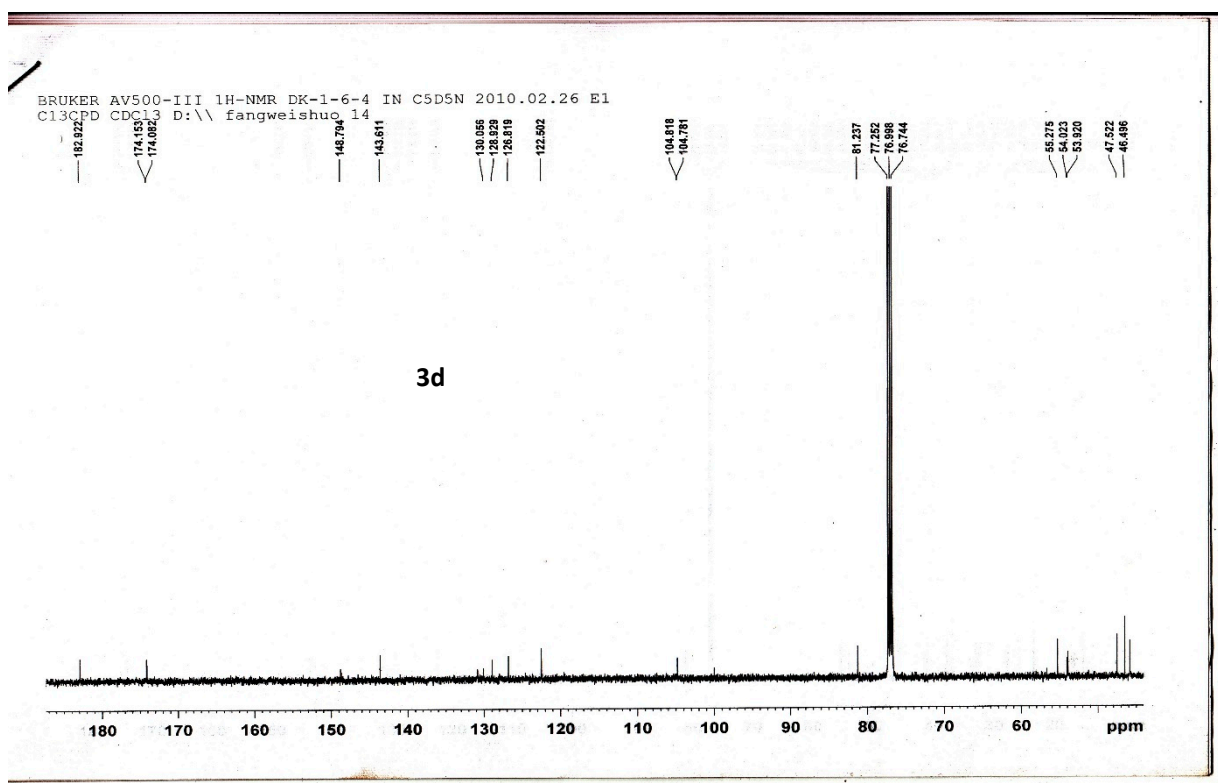



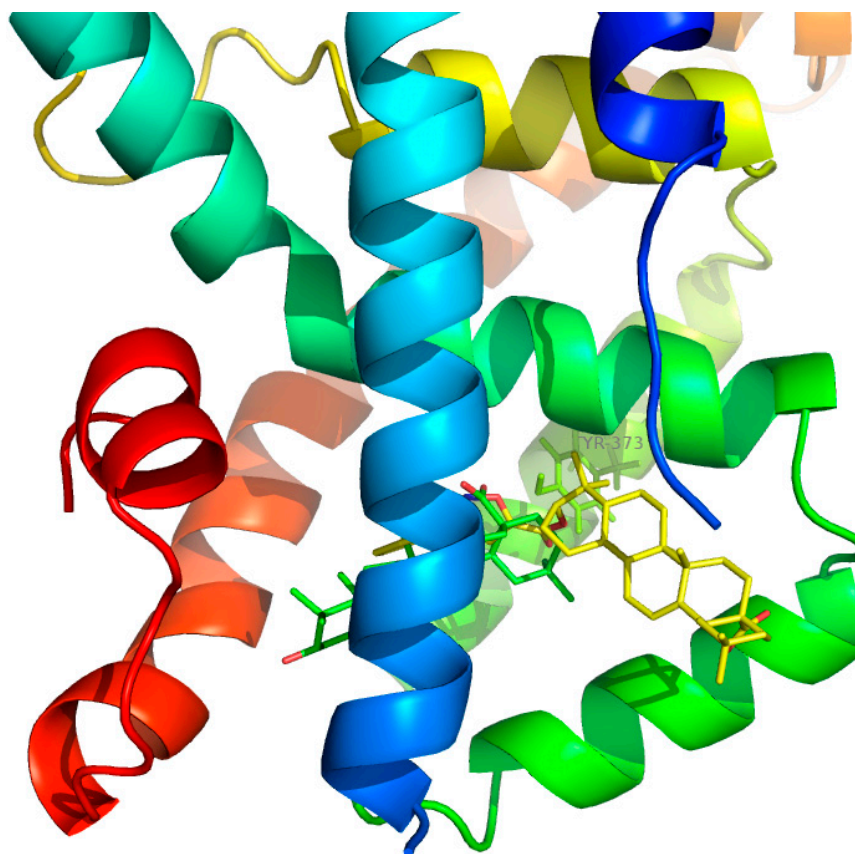

**Figure S1** Binding modes of OA (green) and **3a** (yellow) into FXR
